# Supplementary material
Source: publisher site journal article supplement (https://www.dovepress.com/article/363135)
Supplement: Supplementary file 1 [file get_supplementary_file.php]

Development of Paeonol Liposomes: Design, Optimization, in vitro and in vivo Evaluation

**Table S1** Design factor level of Box-Behnken response surface method

|  | Level | | |
| --- | --- | --- | --- |
| -1 | 0 | 1 |
| A | 4:1 | 6:1 | 8:1 |
| B | 2.0 | 3.0 | 4.0 |
| C | 6.0 | 6.5 | 7.0 |

**Table S2** Experimental arrangement and results of Box-Behnken response surface method

| Run | A (w/w) | B (mg/mL) | C | EE (%) |
| --- | --- | --- | --- | --- |
| 1  2  3  4  5  6  7  8  9  10  11  12  13  14  15  16  17 | 0  0  0  0  0  0  0  0  -1  -1  -1  -1  1  1  1  1  0 | 1  0  -1  1  -1  0  0  0  0  -1  0  1  0  -1  0  1  0 | 1  0  -1  -1  1  0  0  0  -1  0  1  0  1  0  -1  0  0 | 84.34  89.75  85.62  83.01  83.48  90.17  89.84  89.62  86.99  82.40  84.30  82.88  85.12  84.15  83.50  80.13  89.46 |

**Table S3** Results of variance analysis

| Source | Sum of Squares | df | Mean Square | F-value | P-value |  |
| --- | --- | --- | --- | --- | --- | --- |
| Model | 156.81 | 9 | 17.42 | 117.11 | <0.0001 | significant |
| A | 1.68 | 1 | 1.68 | 11.32 | 0.0120 |  |
| B | 3.50 | 1 | 3.50 | 23.51 | 0.0019 |  |
| C | 0.4418 | 1 | 0.4418 | 2.97 | 0.1285 |  |
| AB | 5.06 | 1 | 5.06 | 34.03 | 0.0006 |  |
| AC | 4.64 | 1 | 4.64 | 31.21 | 0.0008 |  |
| BC | 3.01 | 1 | 3.01 | 20.23 | 0.0028 |  |
| A2 | 44.65 | 1 | 44.65 | 300.12 | <0.0001 |  |
| B2 | 71.52 | 1 | 71.52 | 480.73 | <0.0001 |  |
| C2 | 9.91 | 1 | 9.91 | 66.60 | <0.0001 |  |
| Residual | 1.04 | 7 | 0.1488 |  |  |  |
| Lack of Fit | 0.7576 | 3 | 0.2525 | 3.56 | 0.1259 | not significant |
| Pure Error | 0.2839 | 4 | 0.0710 |  |  |  |
| Cor Total | 157.85 | 16 |  |  |  |  |
|  | R2=0.9934 |  |  | R2adj=0.9849 |  |  |

**
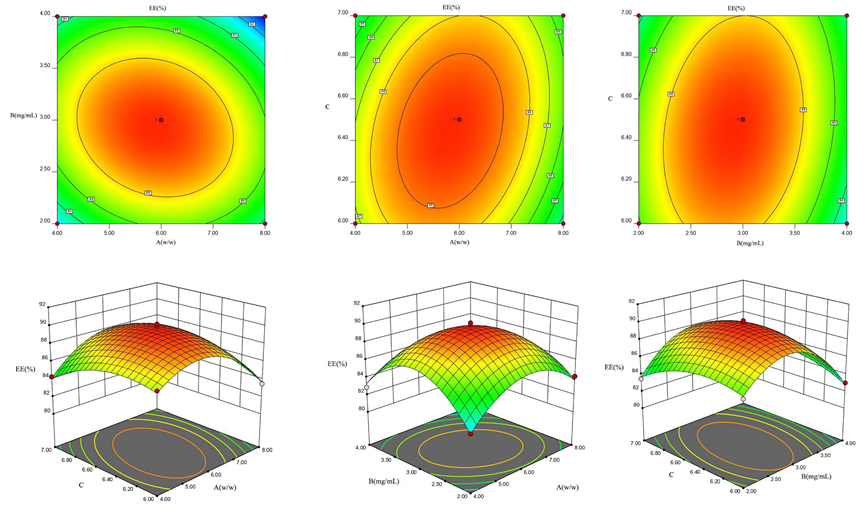
**

**Figure S1** Contour map and 3D effect surface map of the interaction of various factors


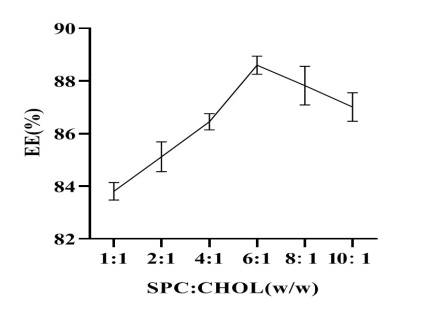

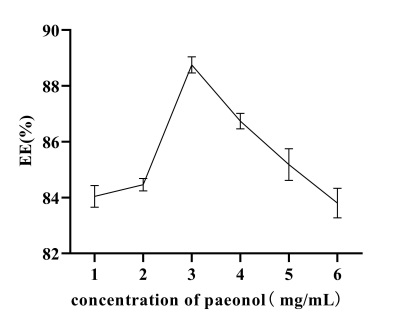

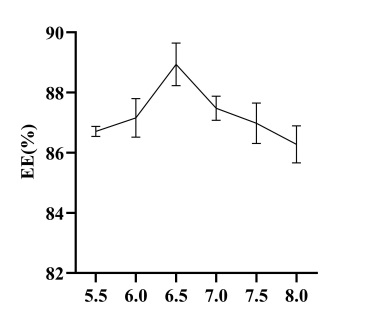


**Figure S2** Single factor experiment results

| paeonol vs Pae-Lips | *p* |
| --- | --- |
| PBS | 0.00131749 |
| SGF | 0.025252673 |
| SIF | 0.001058 |

**Table S4** **The *p*-values for the comparison of the in vitro release of paeonol and Pae-Lips in PBS, SGF and SIF**

**Table S5 The *p*-values for the comparison of the** **pharmacokinetic parameters of paeonol and Pae-Lips**

| paeonol vs Pae-Lips | *p* |
| --- | --- |
| t1/2 | 0.010579157 |
| Cmax | < 0.0001 |
| AUC(0-t) | < 0.0001 |
| AUC(0-∞) | < 0.0001 |
| MRT(0-t) | 0.002699777 |
| CL | < 0.0001 |

**Table S6 The *p*-values for the comparison of the Papp values of different concentrations of paeonol and Pae-Lips at different intestines**

| paeonol vs Pae-Lips (Papp) | *p* |
| --- | --- |
| ileum at low concentrations | 0.020121217 |
| colon at low concentrations | 0.009766212 |
| ileum at middle concentrations | 0.028241684 |
| colon at middle concentrations | 0.01171972 |
| colon at high concentrations | 0.009061318 |

**Table S7 The *p*-values for the comparison of the Ka values of different concentrations of paeonol and Pae-Lips at different intestines**

| paeonol vs Pae-Lips (Ka) | *p* |
| --- | --- |
| ileum at low concentrations | 0.00012168 |
| colon at low concentrations | 0.000981901 |
| ileum at middle concentrations | 0.016767625 |
| colon at middle concentrations | 0.000424527 |
| colon at high concentrations | 0.093786136 |

**Table S8 The *p*-values for the comparison of the Papp values of paeonol and paeonol + Ver at different intestines**

| paeonol vs paeonol + Ver (Papp) | *p* |
| --- | --- |
| duodenum | < 0.0001 |
| jejunum | < 0.0001 |
| ileum | < 0.0001 |
| colon | < 0.0001 |

**Table S9 The *p*-values for the comparison of the Papp values of paeonol and paeonol + Indo at different intestines**

| paeonol vs pae + Indo (Papp) | *p* |
| --- | --- |
| duodenum | < 0.0001 |
| jejunum | < 0.0001 |
| ileum | < 0.0001 |
| colon | < 0.0001 |

**Table S10 The *p*-values for the comparison of the Papp values of paeonol and paeonol + Res at different intestines**

| paeonol vs pae + Res (Papp) | *p* |
| --- | --- |
| duodenum | < 0.0001 |
| jejunum | < 0.0001 |
| ileum | < 0.0001 |
| colon | < 0.0001 |

**Table S11 The *p*-values for the comparison of the Papp values of different concentrations of paeonol and Pae-Lips at different transport directions**

| paeonol vs Pae-Lips (Papp) | *p* |
| --- | --- |
| AP-BL at low concentrations | 0.00483293 |
| BL-AP at low concentrations | 0.042986757 |
| AP-BL at middle concentrations | 0.020660862 |
| BL-AP at middle concentrations | 0.035494661 |
| AP-BL at high concentrations | 0.021300889 |
| BL-AP at high concentrations | 0.048770998 |

**Table S12 The *p*-values for the comparison of the Papp values of paeonol and paeonol + different inhibitors at different transport directions**

| paeonol vs paeonol + Ver (Papp) | *p* |
| --- | --- |
| AP-BL | 0.00010647 |
| BL-AP | 0.044709263 |
| paeonol vs paeonol + Indo (Papp) |  |
| AP-BL | < 0.0001 |
| BL-AP | 0.045528371 |
| paeonol vs paeonol + Res (Papp) |  |
| AP-BL | 0.001907208 |
| BL-AP | 0.030162744 |

**Table S13 The *p*-values for the comparison of the NO, IL-6, IL-10 and TNF-α levels of paeonol and Pae-Lips (middle and high concentrations)**

| paeonol vs Pae-Lips | NO | IL-6 | IL-10 | TNF-α |
| --- | --- | --- | --- | --- |
| Pae-Lips-M | 0.016934113 | 0.025361182 | 0.035434639 | 0.034594663 |
| Pae-Lips-H | 0.000213854 | 0.005114275 | 0.025423585 | 0.008275968 |

**Table S14 The *p*-values for the comparison of the NF-κB and p38 levels of paeonol and Pae-Lips (middle and high concentrations)**

| paeonol vs Pae-Lips | NF-κB | p38 |
| --- | --- | --- |
| Pae-Lips-M | 0.030774547 | 0.00085561 |
| Pae-Lips-H | 0.000905125 | <0.0001 |
